# Supplementary material for: The Evolution of Post-Vaccine G8P[4] Group a Rotavirus Strains in Rwanda; Notable Variance at the Neutralization Epitope Sites
Source: MDPI journal article supplement (doi:10.3390/pathogens12050658), 2023-04-28
Supplement: s1 [file s1]

### Supplementary Table S3

Table S3: The complete nucleotide and amino acid lengths of Rwandan G8P[4] genomic segments

| Genome segments   | VP1  | VP2  | VP3  | VP4  | VP6  | VP7 | NSP1 | NSP2 | NSP3 | NSP4 | NSP5 |
|-------------------|------|------|------|------|------|-----|------|------|------|------|------|
| Nucleotide length | 3264 | 2637 | 2505 | 2325 | 1191 | 978 | 1458 | 951  | 930  | 525  | 600  |
| Amino acid length | 1088 | 879  | 835  | 775  | 397  | 326 | 486  | 317  | 310  | 175  | 200  |
