# Supplementary material for: The Evolution of Post-Vaccine G8P[4] Group a Rotavirus Strains in Rwanda; Notable Variance at the Neutralization Epitope Sites
Source: MDPI journal article supplement (doi:10.3390/pathogens12050658), 2023-04-28
Supplement: s1 [file s1]

**Supplementary Table S2: Accession numbers for the reference sequences used in the construction of the Maximum Likelihood phylogenetic trees**

| VP7                                                      | VP4                                                                                          | VP6                              | VP1                  | VP2                                          | VP3                                                                  | NSP1                                                                                                     | NSP2                                                                   | NSP3                                                                 | NSP4                 | NSP5                                                                             |
|----------------------------------------------------------|----------------------------------------------------------------------------------------------|----------------------------------|----------------------|----------------------------------------------|----------------------------------------------------------------------|----------------------------------------------------------------------------------------------------------|------------------------------------------------------------------------|----------------------------------------------------------------------|----------------------|----------------------------------------------------------------------------------|
| Outgroup                                                 | Outgroup                                                                                     | Outgroup                         | Outgroup             | Outgroup                                     | Outgroup                                                             | Outgroup                                                                                                 | Outgroup                                                               | Outgroup                                                             | Outgroup             | Outgroup                                                                         |
| GU723327                                                 | JX406750                                                                                     | JX406752                         | JX406747             | JX406748                                     | JX406749                                                             | JX406751                                                                                                 | JX406754                                                               | JX406753                                                             | JX406756             | JX406757                                                                         |
| Lineage I                                                | Lineage I                                                                                    | Lineage I                        | Lineage I            | Lineage I                                    | Lineage I                                                            | Lineage I                                                                                                | Lineage I                                                              | Lineage I                                                            | Lineage I            | Lineage I                                                                        |
| GQ41454<br>KC870012<br>KC870004<br>JN71110<br>JN71112    | LC001901<br>KC443590<br>HQ650119                                                             | DQ870507<br>HQ650121<br>KC443591 | DQ870505<br>KC443587 | HQ650117                                     | HQ650118<br>KC443589                                                 | HQ650120<br>KC443582                                                                                     | HQ650123                                                               | HQ650122<br>KC443584                                                 | HQ650125             | HQ650126<br>KC443586                                                             |
| Lineage II                                               | Lineage II                                                                                   | Lineage II                       | Lineage II           | Lineage II                                   | Lineage II                                                           | Lineage II                                                                                               | Lineage II                                                             | Lineage II                                                           | Lineage II           | Lineage II                                                                       |
| FJ347105<br>KF500212<br>MF940553<br>MF940609<br>MF940611 | KJ752665<br>KJ752461<br>KF636314<br>MG892018<br>MG926728                                     | JF304930                         | DQ146693<br>JF304915 | JF304916<br>JF304927                         | EF583035<br>JF304928                                                 | AB975785<br>GQ414546                                                                                     | EU708908<br>EU708930<br>EU708952                                       | JF304934<br>EF672593                                                 | DQ525190<br>KC178746 | KC178755<br>JQ715677                                                             |
| Lineage III                                              | Lineage III                                                                                  | Lineage III                      | Lineage III          | Lineage III                                  | Lineage III                                                          | Lineage III                                                                                              | Lineage III                                                            | Lineage III                                                          | Lineage III          | Lineage III                                                                      |
| FJ611782<br>AF20706<br>AF034852<br>EF672560              | AB733131                                                                                     | AB733132                         | LC438390<br>AB733133 | AB733134<br>LC438391                         | LC438392<br>AB733135                                                 | AB733136<br>LC438396                                                                                     | AB733137<br>LC438397                                                   | AB733138                                                             | D88829<br>LC438399   | AB091727<br>LC438400                                                             |
| Lineage IV                                               | Lineage IV                                                                                   | Lineage IV                       | Lineage IV           | Lineage IV                                   | Lineage IV                                                           | Lineage IV                                                                                               | Lineage IV                                                             | Lineage IV                                                           | Lineage IV           | Lineage IV                                                                       |
| AF104104<br>JX156636<br>FJ861661                         | MG181837<br>MG652350<br>JQ069668<br>KP882275<br>KC443159<br>KC443258<br>KP007171<br>KP753181 | AB762771<br>AY787645             | AB762772<br>AY787653 | KC443785<br>EF554083<br>AY787652<br>LC065021 | AB762774<br>AY787654                                                 | KJ751619<br>EF554088<br>AB762775<br>MG181827<br>JX965145<br>MT767401<br>KC442887<br>KU248378<br>KJ753518 | AY787648                                                               | LC002076<br>AB762777                                                 | AB762778<br>AY87650  | LC065027<br>AB971565<br>MH301253<br>KC443783<br>JX965157<br>KF716441<br>KU248393 |
| Lineage V                                                |                                                                                              | Lineage V                        | Lineage V            | Lineage V                                    | Lineage V                                                            | Lineage V                                                                                                | Lineage V                                                              | Lineage V                                                            | Lineage V            |                                                                                  |
| KJ751607<br>LC177390<br>MG891987<br>KX655500<br>KF636316 |                                                                                              | EF554086                         | KU059766<br>KU550262 | EU708891<br>EU708902                         | LC026108<br>KC443786<br>JX965139<br>KC443786<br>KC443622<br>KF716382 | JX416214<br>EF672592                                                                                     | KU059773<br>LC002074.1<br>KC442959<br>KR705329<br>MN223989<br>JX965148 | LC074739<br>EF554090<br>MG181928<br>KJ752125<br>KC571499<br>KU361002 | HM467979<br>HQ641371 |                                                                                  |

|  |  |                      |                      |                      |                                                                                  |  |                                                                      |                                              |                      |  |
|--|--|----------------------|----------------------|----------------------|----------------------------------------------------------------------------------|--|----------------------------------------------------------------------|----------------------------------------------|----------------------|--|
|  |  |                      |                      |                      | KF716381<br>LC060819<br>KR705214<br>LC026108<br>KR705401<br>MG181768<br>KJ752996 |  | KU059773<br>KJ753821<br>LC002074<br>KJ753486<br>KM660141<br>KJ583192 | KP882535<br>KP188805<br>MF184795<br>KJ752615 |                      |  |
|  |  | <b>Lineage VI</b>    | <b>Lineage VI</b>    | <b>Lineage VI</b>    | <b>Lineage VI</b>                                                                |  |                                                                      | <b>Lineage VI</b>                            | <b>Lineage VI</b>    |  |
|  |  | KJ748480<br>KP882628 | EF554082<br>KJ751624 | KP882630<br>KP882685 | JX416213<br>KP882477                                                             |  |                                                                      | JX416216<br>AB753500                         | AB796456<br>LC228324 |  |
|  |  | <b>Lineage VII</b>   | <b>Lineage VII</b>   | <b>Lineage VII</b>   | <b>Lineage VII</b>                                                               |  |                                                                      | <b>Lineage VII</b>                           | <b>Lineage VII</b>   |  |
|  |  | LC095956<br>LC169856 | FJ031024<br>JQ013502 | FN665689<br>GU384191 | GU937879<br>LC105582                                                             |  |                                                                      | EF672558<br>JQ863317                         | KX265688<br>AB975935 |  |
|  |  | <b>Lineage VIII</b>  | <b>Lineage VIII</b>  | <b>Lineage VIII</b>  | <b>Lineage VIII</b>                                                              |  |                                                                      |                                              | <b>Lineage VIII</b>  |  |
|  |  | EF583020             | LC065020<br>FN665688 | HQ834198<br>JQ013503 | EF554106                                                                         |  |                                                                      |                                              | AB938299<br>GU937886 |  |
|  |  | <b>Lineage IX</b>    | <b>Lineage IX</b>    | <b>Lineage IX</b>    | <b>Lineage IX</b>                                                                |  |                                                                      |                                              | <b>Lineage IX</b>    |  |
|  |  | KP882925<br>EF554152 | EF583017<br>EF576937 | GU827407<br>EF554105 | JQ013504<br>HQ834207                                                             |  |                                                                      |                                              | LC119113<br>KP882481 |  |
|  |  | <b>Lineage X</b>     | <b>Lineage X</b>     | <b>Lineage X</b>     | <b>Lineage X</b>                                                                 |  |                                                                      |                                              | <b>Lineage X</b>     |  |
|  |  | DQ870496<br>EF554130 | GU296420<br>EF554104 | AB748581<br>KC815659 | EF583015<br>DQ70495                                                              |  |                                                                      |                                              | KM660203<br>KM660192 |  |
|  |  | <b>Lineage XI</b>    | <b>Lineage XI</b>    | <b>Lineage XI</b>    | <b>Lineage XI</b>                                                                |  |                                                                      |                                              | <b>Lineage XI</b>    |  |
|  |  | EF583016<br>KC175098 | LCO7473<br>LC102997  | EF583014<br>JF421976 | EF554084<br>GU296424                                                             |  |                                                                      |                                              | KUO59775             |  |
|  |  | <b>Lineage XII</b>   | <b>Lineage XII</b>   | <b>Lineage XII</b>   | <b>Lineage XII</b>                                                               |  |                                                                      |                                              | <b>Lineage XII</b>   |  |
|  |  | AY740737<br>KP258402 | KJ919361<br>KC175269 | JX271002<br>EF583042 | JF304917<br>AB751564                                                             |  |                                                                      |                                              | LC074740<br>LC102992 |  |
|  |  | <b>Lineage XIII</b>  | <b>Lineage XIII</b>  | <b>Lineage XIII</b>  | <b>Lineage XIII</b>                                                              |  |                                                                      |                                              | <b>Lineage XIII</b>  |  |
|  |  | AB573073<br>DQ838647 | JX271001<br>JF693037 | KM454482<br>KM454493 | KJ748478<br>KJ748467                                                             |  |                                                                      |                                              | EF592592             |  |
|  |  | <b>Lineage XIV</b>   | <b>Lineage XIV</b>   | <b>Lineage XIV</b>   |                                                                                  |  |                                                                      |                                              | <b>Lineage XIV</b>   |  |
|  |  | EF554108<br>GU827410 | JN903527<br>JQ345489 | EF554127<br>KF636257 |                                                                                  |  |                                                                      |                                              | JF304924<br>AB755562 |  |
|  |  | <b>Lineage XV</b>    |                      |                      |                                                                                  |  |                                                                      |                                              | <b>Lineage XV</b>    |  |
|  |  | JQ345494<br>AB908927 |                      |                      |                                                                                  |  |                                                                      |                                              | GU25961<br>DQ005105  |  |
|  |  |                      |                      |                      |                                                                                  |  |                                                                      |                                              | <b>Lineage XVI</b>   |  |
|  |  |                      |                      |                      |                                                                                  |  |                                                                      |                                              | EF554135             |  |
|  |  |                      |                      |                      |                                                                                  |  |                                                                      |                                              | <b>Lineage XVII</b>  |  |
|  |  |                      |                      |                      |                                                                                  |  |                                                                      |                                              | GU827415<br>GU296416 |  |

|  |  |  |  |  |  |  |  |  |                                  |  |
|--|--|--|--|--|--|--|--|--|----------------------------------|--|
|  |  |  |  |  |  |  |  |  | Lineage XVIII                    |  |
|  |  |  |  |  |  |  |  |  | KY426806<br>JN831207             |  |
|  |  |  |  |  |  |  |  |  | Lineage XIX                      |  |
|  |  |  |  |  |  |  |  |  | KC257089<br>KP198645             |  |
|  |  |  |  |  |  |  |  |  | Lineage XX                       |  |
|  |  |  |  |  |  |  |  |  | EF554157<br>KJ940160             |  |
|  |  |  |  |  |  |  |  |  | Lineage XXI                      |  |
|  |  |  |  |  |  |  |  |  | KJ870898<br>KJ748485             |  |
|  |  |  |  |  |  |  |  |  | Lineage XXII                     |  |
|  |  |  |  |  |  |  |  |  | EF672561<br>KP941135             |  |
|  |  |  |  |  |  |  |  |  | Lineage XXIII                    |  |
|  |  |  |  |  |  |  |  |  | MG181621<br>MG181929             |  |
|  |  |  |  |  |  |  |  |  | Lineage XXIV                     |  |
|  |  |  |  |  |  |  |  |  | JN248454<br>KP752503<br>LC055556 |  |
|  |  |  |  |  |  |  |  |  | Lineage XXV                      |  |
|  |  |  |  |  |  |  |  |  | FJ031022<br>JQ031148             |  |
|  |  |  |  |  |  |  |  |  | Lineage XXVI                     |  |
|  |  |  |  |  |  |  |  |  | AJ311728<br>AJ311729             |  |
|  |  |  |  |  |  |  |  |  | Lineage XXVII                    |  |
|  |  |  |  |  |  |  |  |  | JQ687223<br>JN903510             |  |
|  |  |  |  |  |  |  |  |  | Lineage XXVIII                   |  |
|  |  |  |  |  |  |  |  |  | KC815689                         |  |
|  |  |  |  |  |  |  |  |  | Lineage XXIX                     |  |
|  |  |  |  |  |  |  |  |  | GU181282                         |  |
|  |  |  |  |  |  |  |  |  | Lineage XXX                      |  |
|  |  |  |  |  |  |  |  |  | KY972050<br>KY972002             |  |
